# Supplementary material for: Usage of Children’s Makeup and Body Products in the United States and Implications for Childhood Environmental Exposures
Source: Int J Environ Res Public Health. 2023 Jan 24;20(3):2114. doi: 10.3390/ijerph20032114 (PMC9915933; doi:10.3390/ijerph20032114)
Supplement: Supplementary file 1 [file ijerph-20-02114-s001.zip › ijerph-2161775-supplementary.pdf]

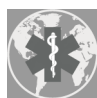

Supplementary Materials

# Usage of Children's Makeup and Body Products in the United States and Implications for Childhood Environmental Exposures

Eleanor A. Medley <sup>1,†</sup>, Kendall E. Kruchten <sup>1,†</sup>, Miranda J. Spratlen <sup>1</sup>, Maricela Ureño <sup>1</sup>, Anabel Cole <sup>1</sup>,  
Rashmi Joglekar <sup>2</sup> and Julie B. Herbstman <sup>1,\*</sup>

<sup>1</sup> Columbia Center for Children's Environmental Health, Department of Environmental Health Sciences, Columbia University Mailman School of Public Health, New York, NY 10032, USA

<sup>2</sup> Earthjustice, Toxic Exposure and Health Program, Washington, DC 20001, USA

\* Correspondence: jh2678@cumc.columbia.edu

† These authors contributed equally to this work.

**Table S1.** Qualitative analysis of open text question codebook.

| Theme                      | Code Name         | When to Apply                                                                                                                                                                                                                |
|----------------------------|-------------------|------------------------------------------------------------------------------------------------------------------------------------------------------------------------------------------------------------------------------|
| Motivations for use        | Play              | Response suggests child uses children's makeup and body products for fun or during explicitly play activities                                                                                                                |
|                            | Beauty            | Response suggests child uses children's makeup and body products for beautification purposes                                                                                                                                 |
|                            | Practical Purpose | Response describes practical purpose for using children's makeup and body products distinct from play or beautification motivations (e.g. using nail polish to stop nail biting habit, using hair detangler for large knots) |
| Safety                     | Health concerns   | Response expresses concern about the health implications of children's makeup and body products                                                                                                                              |
|                            | Adult supervision | Response mentions adult supervision of product use                                                                                                                                                                           |
| Introduction and influence | Adult influence   | Response describes how adult use of cosmetic products affects child's use of children's makeup and body products                                                                                                             |
|                            | Marketing         | Response mentions influence of marketing/packaging of children's makeup and body products on their child                                                                                                                     |
| Other products             | Drug              | Response identifies a product that can reasonably be assumed to be categorized as a drug based on the FDA definition (Not applicable to this investigation)                                                                  |

|            |                         |                                                                                                                           |
|------------|-------------------------|---------------------------------------------------------------------------------------------------------------------------|
| Not usable | Not makeup/body product | Response describes a product that is not makeup nor a body product                                                        |
|            | No new info             | Response reiterates response to previously asked multiple choice question and does not provide any additional information |
|            | Not enough information  | Not enough information present in the response to code                                                                    |

**Table S2.** CMBP use behaviors by child age. Fisher's exact test was used for categorical variables and Kruskal-Wallis test was used for numerical variables (play-beautification rating).

|                                                                                                 | 0-3<br>(n=48) | 4-6<br>(n=64) | 7-9<br>(n=68) | 10-12<br>(n=39) | Total<br>(n=219) | p-Value |
|-------------------------------------------------------------------------------------------------|---------------|---------------|---------------|-----------------|------------------|---------|
| <b>Type of CMBP used</b>                                                                        |               |               |               |                 |                  |         |
| Body                                                                                            | 26 (54.2%)    | 32 (50.0%)    | 49 (72.1%)    | 23 (59.0%)      | 130 (59.4%)      | 0.057   |
| Hair                                                                                            | 19 (39.6%)    | 26 (40.6%)    | 34 (50.0%)    | 17 (43.6%)      | 96 (43.8%)       | 0.648   |
| Face                                                                                            | 13 (27.1%)    | 26 (40.6%)    | 32 (47.1%)    | 18 (46.2%)      | 89 (40.6%)       | 0.145   |
| Nail                                                                                            | 10 (20.8%)    | 26 (40.6%)    | 22 (32.4%)    | 12 (30.8%)      | 70 (32.0%)       | 0.174   |
| Lip                                                                                             | 14 (29.2%)    | 15 (23.4%)    | 25 (36.8%)    | 12 (30.8%)      | 66 (30.1%)       | 0.424   |
| Fragrance                                                                                       | 15 (31.3%)    | 18 (28.1%)    | 23 (33.8%)    | 11 (28.2%)      | 67 (30.6%)       | 0.897   |
| Eye                                                                                             | 9 (18.8%)     | 7 (10.9%)     | 14 (20.6%)    | 9 (23.1%)       | 39 (17.8%)       | 0.336   |
| None                                                                                            | 2 (4.17%)     | 0 (0%)        | 1 (1.47%)     | 1 (2.56%)       | 4 (1.83%)        | 0.392   |
| Do not know                                                                                     | 1 (2.08%)     | 0 (0%)        | 0 (0%)        | 0 (0%)          | 1 (0.457%)       | 0.397   |
| <b>Proportion of makeup and body products used that are child products (vs. adult products)</b> |               |               |               |                 |                  |         |
| None (0%)                                                                                       | 1 (2.08%)     | 1 (1.56%)     | 3 (4.41%)     | 1 (2.56%)       | 6 (2.74%)        | 0.912   |
| Few (Less than 25%)                                                                             | 17 (35.4%)    | 18 (28.1%)    | 22 (32.4%)    | 17 (43.6%)      | 74 (33.8%)       |         |
| Less than Half (25-50%)                                                                         | 10 (20.8%)    | 18 (28.1%)    | 16 (23.5%)    | 8 (20.5%)       | 52 (23.7%)       |         |
| More than Half (50-75%)                                                                         | 9 (18.8%)     | 11 (17.2%)    | 8 (11.8%)     | 6 (15.4%)       | 34 (15.5%)       |         |
| Large Majority (75-100%)                                                                        | 10 (20.8%)    | 15 (23.4%)    | 14 (20.6%)    | 6 (15.4%)       | 45 (20.5%)       |         |
| Do not know                                                                                     | 1 (2.08%)     | 1 (1.56%)     | 5 (7.35%)     | 1 (2.56%)       | 8 (3.65%)        |         |
| <b>Frequency of CMBP Use</b>                                                                    |               |               |               |                 |                  |         |
| Once a year or less                                                                             | 8 (16.7%)     | 6 (9.38%)     | 6 (8.82%)     | 1 (2.56%)       | 21 (9.59%)       | 0.586   |
| A few times a year                                                                              | 15 (31.3%)    | 22 (34.4%)    | 23 (33.8%)    | 15 (38.5%)      | 75 (34.2%)       |         |
| Monthly                                                                                         | 10 (20.8%)    | 11 (17.2%)    | 13 (19.1%)    | 7 (17.9%)       | 41 (18.7%)       |         |
| Once every two weeks                                                                            | 4 (8.33%)     | 5 (7.81%)     | 6 (8.82%)     | 5 (12.8%)       | 20 (9.13%)       |         |
| Weekly                                                                                          | 4 (8.33%)     | 6 (9.38%)     | 13 (19.1%)    | 8 (20.5%)       | 31 (14.2%)       |         |
| Daily or more                                                                                   | 7 (14.6%)     | 11 (17.2%)    | 6 (8.82%)     | 3 (7.69%)       | 27 (12.3%)       |         |
| Do not know                                                                                     | 0 (0%)        | 3 (4.69%)     | 1 (1.47%)     | 0 (0%)          | 4 (1.83%)        |         |

|                                                                          |            |            |            |            |             |         |
|--------------------------------------------------------------------------|------------|------------|------------|------------|-------------|---------|
| Duration of CMBP Use                                                     |            |            |            |            |             |         |
| 0-2 hours                                                                | 15 (31.3%) | 18 (28.1%) | 15 (22.1%) | 7 (17.9%)  | 55 (25.1%)  | 0.4     |
| 2-4 hours                                                                | 11 (22.9%) | 13 (20.3%) | 15 (22.1%) | 11 (28.2%) | 50 (22.8%)  |         |
| 4-6 hours                                                                | 10 (20.8%) | 8 (12.5%)  | 11 (16.2%) | 8 (20.5%)  | 37 (16.9%)  |         |
| 6-8 hours                                                                | 1 (2.08%)  | 4 (6.25%)  | 5 (7.35%)  | 7 (17.9%)  | 17 (7.76%)  |         |
| 8+ hours                                                                 | 10 (20.8%) | 15 (23.4%) | 17 (25.0%) | 5 (12.8%)  | 47 (21.5%)  |         |
| Do not know                                                              | 1 (2.08%)  | 6 (9.38%)  | 5 (7.35%)  | 1 (2.56%)  | 13 (5.94%)  |         |
| Ingestion of CMBP                                                        |            |            |            |            |             |         |
| Yes                                                                      | 17 (35.4%) | 20 (31.3%) | 21 (30.9%) | 9 (23.1%)  | 67 (30.6%)  | 0.888   |
| No                                                                       | 29 (60.4%) | 39 (60.9%) | 41 (60.3%) | 27 (69.2%) | 136 (62.1%) |         |
| Do not know                                                              | 2 (4.17%)  | 5 (7.81%)  | 6 (8.82%)  | 3 (7.69%)  | 16 (7.31%)  |         |
| Who applies CMBP                                                         |            |            |            |            |             |         |
| Child                                                                    | 19 (39.6%) | 32 (50.0%) | 53 (77.9%) | 31 (79.5%) | 135 (62%)   | <0.001* |
| The child themself                                                       | 4 (8.33%)  | 12 (18.8%) | 38 (55.9%) | 23 (59.0%) | 77 (35.2%)  |         |
| Sibling                                                                  | 10 (20.8%) | 14 (21.9%) | 7 (10.3%)  | 2 (5.13%)  | 33 (15.1%)  |         |
| Friend                                                                   | 5 (10.4%)  | 6 (9.38%)  | 8 (11.8%)  | 6 (15.4%)  | 25 (11.4%)  |         |
| Adult                                                                    | 42 (87.5%) | 62 (96.9%) | 62 (91.2%) | 32 (82.1%) | 198 (90.4%) |         |
| Parent                                                                   | 29 (60.4%) | 44 (68.8%) | 40 (58.8%) | 22 (56.4%) | 135 (61.6%) |         |
| Caregiver                                                                | 8 (16.7%)  | 5 (7.81%)  | 8 (11.8%)  | 1 (2.56%)  | 22 (10.0%)  |         |
| Event person                                                             | 5 (10.4%)  | 13 (20.3%) | 14 (20.6%) | 9 (23.1%)  | 41 (18.7%)  |         |
| Frequency with which respondent reads CMBP ingredients before purchasing |            |            |            |            |             |         |
| Never                                                                    | 4 (9.09%)  | 7 (11.7%)  | 10 (15.9%) | 2 (5.56%)  | 23 (11.3%)  | 0.494   |
| Rarely                                                                   | 6 (13.6%)  | 9 (15.0%)  | 12 (19.0%) | 5 (13.9%)  | 32 (15.8%)  |         |
| Sometimes                                                                | 7 (15.9%)  | 15 (25.0%) | 19 (30.2%) | 7 (19.4%)  | 48 (23.6%)  |         |
| Often                                                                    | 17 (38.6%) | 19 (31.7%) | 15 (23.8%) | 12 (33.3%) | 63 (31.0%)  |         |
| Always                                                                   | 9 (20.5%)  | 10 (16.7%) | 7 (11.1%)  | 10 (27.8%) | 36 (17.7%)  |         |
| Prefer not to answer                                                     | 1 (2.27%)  | 0 (0%)     | 0 (0%)     | 0 (0%)     | 1 (0.493%)  |         |
| Frequency of CMBP wear outside the home                                  |            |            |            |            |             |         |
| Never                                                                    | 5 (10.4%)  | 3 (4.69%)  | 2 (2.94%)  | 0 (0%)     | 10 (4.57%)  | 0.273   |

|                                     |                   |                   |                   |                   |                   |        |
|-------------------------------------|-------------------|-------------------|-------------------|-------------------|-------------------|--------|
| Rarely                              | 7 (14.6%)         | 20 (31.3%)        | 16 (23.5%)        | 9 (23.1%)         | 52 (23.7%)        |        |
| Sometimes                           | 16 (33.3%)        | 18 (28.1%)        | 30 (44.1%)        | 16 (41.0%)        | 80 (36.5%)        |        |
| Often                               | 11 (22.9%)        | 15 (23.4%)        | 11 (16.2%)        | 8 (20.5%)         | 45 (20.5%)        |        |
| Always                              | 9 (18.8%)         | 6 (9.38%)         | 9 (13.2%)         | 6 (15.4%)         | 30 (13.7%)        |        |
| Do not know                         | 0 (0%)            | 2 (3.13%)         | 0 (0%)            | 0 (0%)            | 2 (0.913%)        |        |
| <b>Settings CMBP used in</b>        |                   |                   |                   |                   |                   |        |
| Celebrations                        | 24 (50.0%)        | 27 (42.2%)        | 28 (41.2%)        | 20 (51.3%)        | 99 (45.2%)        | 0.636  |
| Day-to-day activities               | 15 (31.3%)        | 21 (32.8%)        | 27 (39.7%)        | 18 (46.2%)        | 81 (37.0%)        | 0.435  |
| Group Play                          | 14 (29.2%)        | 22 (34.4%)        | 20 (29.4%)        | 14 (35.9%)        | 70 (32.0%)        | 0.853  |
| Solo Play                           | 9 (18.8%)         | 12 (18.8%)        | 15 (22.1%)        | 6 (15.4%)         | 42 (19.2%)        | 0.879  |
| Performances                        | 4 (8.33%)         | 17 (26.6%)        | 18 (26.5%)        | 14 (35.9%)        | 53 (24.2%)        | 0.012* |
| Religious Events                    | 4 (8.33%)         | 3 (4.69%)         | 6 (8.82%)         | 4 (10.3%)         | 17 (7.76%)        | 0.713  |
| Unknown                             | 1 (2.08%)         | 3 (4.69%)         | 1 (1.47%)         | 1 (2.56%)         | 6 (2.74%)         | 0.811  |
| <b>Play → Beautification Rating</b> |                   |                   |                   |                   |                   |        |
| Mean (SD)                           | 5.67 (3.24)       | 5.23 (3.22)       | 4.66 (2.69)       | 5.95 (2.50)       | 5.28 (2.97)       | 0.1042 |
| Median [Min, Max]                   | 6.50 [1.00, 10.0] | 6.00 [1.00, 10.0] | 5.00 [1.00, 10.0] | 7.00 [1.00, 10.0] | 6.00 [1.00, 10.0] |        |

\*  $p$ -value < 0.05.

**Table S3.** Parent/guardian demographics by response to open text question. Fisher's exact test was used for categorical variables and Wilcoxon test was used for numerical variables (play-beautification rating).

|                                      | No text re-<br>sponse<br>( <i>n</i> =65) | Text Re-<br>sponse<br>( <i>n</i> =98) | Total<br>( <i>n</i> =163) | <i>p</i> -Value |
|--------------------------------------|------------------------------------------|---------------------------------------|---------------------------|-----------------|
| Survey Language                      |                                          |                                       |                           |                 |
| English                              | 60 (92.3%)                               | 87 (88.8%)                            | 147 (90.2%)               | 0.594           |
| Spanish                              | 5 (7.69%)                                | 11 (11.2%)                            | 16 (9.82%)                |                 |
| Type of Community                    |                                          |                                       |                           |                 |
| Urban                                | 47 (72.3%)                               | 45 (45.9%)                            | 92 (56.4%)                | 0.005*          |
| Suburban                             | 11 (16.9%)                               | 35 (35.7%)                            | 46 (28.2%)                |                 |
| Rural                                | 7 (10.8%)                                | 15 (15.3%)                            | 22 (13.5%)                |                 |
| Prefer not to answer                 | 0 (0%)                                   | 3 (3.06%)                             | 3 (1.84%)                 |                 |
| Parent/Guardian Age                  |                                          |                                       |                           |                 |
| <30                                  | 18 (27.7%)                               | 13 (13.3%)                            | 31 (19.0%)                | <0.001*         |
| 30-39                                | 41 (63.1%)                               | 48 (49.0%)                            | 89 (54.6%)                |                 |
| 40-49                                | 5 (7.69%)                                | 32 (32.7%)                            | 37 (22.7%)                |                 |
| 50+                                  | 1 (1.54%)                                | 4 (4.08%)                             | 5 (3.07%)                 |                 |
| Prefer not to answer                 | 0 (0%)                                   | 1 (1.02%)                             | 1 (0.613%)                |                 |
| Parent/Guardian Gender               |                                          |                                       |                           |                 |
| Cisgender Female                     | 44 (67.7%)                               | 80 (81.6%)                            | 124 (76.1%)               | 0.034*          |
| Transgender Female                   | 0 (0%)                                   | 0 (0%)                                | 0 (0%)                    |                 |
| Cisgender Male                       | 21 (32.3%)                               | 16 (16.3%)                            | 37 (22.7%)                |                 |
| Transgender Male                     | 0 (0%)                                   | 0 (0%)                                | 0 (0%)                    |                 |
| Non-binary                           | 0 (0%)                                   | 0 (0%)                                | 0 (0%)                    |                 |
| Two Spirit                           | 0 (0%)                                   | 1 (1.02%)                             | 1 (0.613%)                |                 |
| Prefer not to answer                 | 0 (0%)                                   | 1 (1.02%)                             | 1 (0.613%)                |                 |
| Parent/Guardian Race                 |                                          |                                       |                           |                 |
| White                                | 45 (69.2%)                               | 47 (48.0%)                            | 92 (56.4%)                | 0.11            |
| Black/African American               | 4 (6.15%)                                | 10 (10.2%)                            | 14 (8.59%)                |                 |
| South Asian                          | 2 (3.08%)                                | 1 (1.02%)                             | 3 (1.84%)                 |                 |
| East Asian                           | 1 (1.54%)                                | 1 (1.02%)                             | 2 (1.23%)                 |                 |
| American Indian/Alaska Native        | 1 (1.54%)                                | 7 (7.14%)                             | 8 (4.91%)                 |                 |
| Native Hawaiian/Pacific Islander     | 0 (0%)                                   | 1 (1.02%)                             | 1 (0.613%)                |                 |
| Middle Eastern/North African         | 0 (0%)                                   | 0 (0%)                                | 0 (0%)                    |                 |
| American Indian/Alaska Native, White | 0 (0%)                                   | 1 (1.02%)                             | 1 (0.613%)                |                 |

|                                           |             |              |             |        |
|-------------------------------------------|-------------|--------------|-------------|--------|
| American Indian/Alaska Native, East Asian | 0 (0%)      | 1 (1.02%)    | 1 (0.613%)  |        |
| Prefer not to answer                      | 12 (18.5%)  | 29 (29.6%)   | 41 (25.2%)  |        |
| <b>Parent/Guardian Ethnicity</b>          |             |              |             |        |
| Non-Hispanic                              | 52 (80.0%)  | 64 (65.3%)   | 116 (71.2%) | 0.073  |
| Hispanic/Latinx                           | 13 (20.0%)  | 32 (32.7%)   | 45 (27.6%)  |        |
| Prefer not to answer                      | 0 (0%)      | 2 (2.04%)    | 2 (1.23%)   |        |
| <b>Parent/Guardian Education</b>          |             |              |             |        |
| High School or Less                       | 3 (4.62%)   | 15 (15.3%)   | 18 (11.0%)  | 0.016* |
| Some College/College                      | 50 (76.9%)  | 54 (55.1%)   | 104 (63.8%) |        |
| Some Graduate School or more              | 12 (18.5%)  | 28 (28.6%)   | 40 (24.5%)  |        |
| Prefer not to answer                      | 0 (0%)      | 1 (1.02%)    | 1 (0.613%)  |        |
| <b>Household Income</b>                   |             |              |             |        |
| Less than \$25k                           | 4 (6.15%)   | 7 (7.14%)    | 11 (6.75%)  | 0.844  |
| \$25k - \$75k                             | 15 (23.1%)  | 29 (29.6%)   | 44 (27.0%)  |        |
| \$75k - \$125k                            | 26 (40.0%)  | 29 (29.6%)   | 55 (33.7%)  |        |
| \$125k - \$175k                           | 8 (12.3%)   | 13 (13.3%)   | 21 (12.9%)  |        |
| \$175k+                                   | 9 (13.8%)   | 14 (14.3%)   | 23 (14.1%)  |        |
| Prefer not to answer                      | 3 (4.62%)   | 6 (6.12%)    | 9 (5.52%)   |        |
| <b>Number of Children 12 and Under</b>    |             |              |             |        |
| 1                                         | 48 (73.8%)  | 52 (53.1%)   | 100 (61.3%) | 0.009* |
| 2                                         | 10 (15.4%)  | 37 (37.8%)   | 47 (28.8%)  |        |
| 3                                         | 6 (9.23%)   | 8 (8.16%)    | 14 (8.59%)  |        |
| 4                                         | 1 (1.54%)   | 1 (1.02%)    | 2 (1.23%)   |        |
| 5                                         | 0 (0%)      | 0 (0%)       | 0 (0%)      |        |
| <b>Play → Beautification Rating</b>       |             |              |             |        |
| Mean (SD)                                 | 5.46 (2.81) | 5.168 (3.06) | 5.28 (2.97) | 0.528  |
| Median [Min, Max]                         | 6 [1, 10]   | 5 [1, 10]    | 6 [1, 10]   |        |

\*  $p$ -value < 0.05.
